# Supplementary material
Source: Springer Nature journal article supplement (https://www.springermedizin.de/resource/supplementary/12879_2012_2145_MOESM1_ESM.pdf/9443676)
Supplement: MOESM1 [file 9443676]

**Screen all patients with HIV attending the outpatient clinic:**

**First criteria:** 18+ years old, on ART for a month or more (not PMTCT or Post Exposure Prophylaxis (PEP)), cognitively able to consent, speaks English or Swahili in Kenya or English, isiXhosa or Afrikaans in South Africa - if ✓ then proceed to second step

**Screen for second criteria:** APCA African POS pain and symptom items (past three days)

**APCA POS**

**Pain and symptoms 0, 1 or 2**

Carry on receiving usual care.  
No entry into study ✗

**APCA POS Pain or symptoms**

**3, 4 or 5 ✓**

**Problems acute**, i.e. lasting for less than 2 weeks, no entry into study ✗

**Problems not acute**

Invite into study ✓

**Refuse**

Carry on receiving usual care,  
no entry into study ✗

**Accept**

Take consent, allocate ID code, collect baseline (Month 0) data (Demographic, POS, MOS-HIV, General Health Questionnaire, Client Services Receipt Inventory and Adherence and Risk questionnaire)

**CONTROL**

Carry on receiving **usual care** from clinic ✓  
(n=60 per country)

**INTERVENTION:**

Receive care from HIV nurse trained and supervised in **palliative care** ✓  
(n=60 per country)

**BOTH INTERVENTION AND CONTROL:**

Collect **data** at month 1, 2, 3, 4  
All patients receive reimbursement at each research appointment.

Optional qualitative interview 1-4 months after exiting the trial, with a purposive representative sample of intervention and control patients
